# Supplementary material
Source: MDPI journal article supplement (doi:10.3390/agronomy16121211)
Supplement: s1 [file agronomy-4307953-supplementary.pdf › agronomy-4307953-supplementary.pdf]

**Table S1.** Meteorological information of the cotton growth period in the experimental site.

| <b>Meteorological data</b>   | <b>Year</b> | <b>April</b> | <b>May</b> | <b>June</b> | <b>July</b> | <b>August</b> | <b>September</b> |
|------------------------------|-------------|--------------|------------|-------------|-------------|---------------|------------------|
| Precipitation (mm)           | 2024        | 4.20         | 5.10       | 13.30       | 125.10      | 79.80         | 61.60            |
|                              | 2025        | 1.90         | 41.30      | 83.20       | 114.80      | 27.70         | 108.30           |
| Sunshine duration (h)        | 2024        | 240.54       | 309.28     | 260.06      | 176.6       | 261.33        | 170.22           |
|                              | 2025        | 274.94       | 292.84     | 234.15      | 286.92      | 236.65        | 149.55           |
| Maximum air temperature (°C) | 2024        | 22.90        | 28.54      | 34.92       | 31.87       | 33.36         | 28.48            |
|                              | 2025        | 25.03        | 27.90      | 33.89       | 34.63       | 32.99         | 26.72            |
| Minimum air temperature (°C) | 2024        | 11.32        | 15.42      | 21.07       | 23.26       | 23.23         | 17.93            |
|                              | 2025        | 9.54         | 14.35      | 20.96       | 25.04       | 23.74         | 16.48            |

**Table S2.** Descriptive statistics (mean  $\pm$  SD) of above-ground biomass, radiation use efficiency, yield and yield components for all treatment combinations in 2024.

| Experiment  | Treatment | AGB                            | RUE                   | SY                             | LP               | BW              | BN                               |
|-------------|-----------|--------------------------------|-----------------------|--------------------------------|------------------|-----------------|----------------------------------|
|             |           | (kg $\cdot$ ha <sup>-1</sup> ) | (g MJ <sup>-1</sup> ) | (kg $\cdot$ ha <sup>-1</sup> ) | (%)              | (g)             | (bolls $\cdot$ m <sup>-2</sup> ) |
| Sowing date | S1        | 14270.34 $\pm$ 847.97          | 3.36 $\pm$ 0.20       | 2496.94 $\pm$ 96.55            | 52.77 $\pm$ 2.57 | 4.73 $\pm$ 0.13 | 34.59 $\pm$ 0.28                 |
|             | S2        | 12159.84 $\pm$ 355.93          | 2.60 $\pm$ 0.08       | 2614.68 $\pm$ 285.83           | 55.05 $\pm$ 4.37 | 4.74 $\pm$ 0.15 | 35.84 $\pm$ 0.82                 |
|             | S3        | 12670.64 $\pm$ 2389.69         | 2.68 $\pm$ 0.51       | 2303.82 $\pm$ 200.09           | 48.26 $\pm$ 3.08 | 4.77 $\pm$ 0.11 | 34.43 $\pm$ 0.94                 |
|             | S4        | 12876.84 $\pm$ 1248.41         | 3.08 $\pm$ 0.30       | 2209.55 $\pm$ 191.88           | 45.52 $\pm$ 3.71 | 4.85 $\pm$ 0.10 | 34.06 $\pm$ 0.54                 |
|             | S5        | 12351.27 $\pm$ 1404.90         | 2.62 $\pm$ 0.30       | 1848.57 $\pm$ 352.39           | 37.87 $\pm$ 5.92 | 4.87 $\pm$ 0.17 | 33.96 $\pm$ 0.60                 |
|             | S6        | 9195.50 $\pm$ 1136.64          | 2.13 $\pm$ 0.26       | 1558.55 $\pm$ 461.28           | 31.43 $\pm$ 8.68 | 4.95 $\pm$ 0.18 | 33.00 $\pm$ 0.82                 |
| Density     | D1        | 6149.20 $\pm$ 1024.91          | 1.74 $\pm$ 0.29       | 2237.88 $\pm$ 361.21           | 38.50 $\pm$ 5.39 | 5.80 $\pm$ 0.13 | 31.16 $\pm$ 1.52                 |
|             | D2        | 7428.10 $\pm$ 2896.27          | 1.73 $\pm$ 0.68       | 2690.99 $\pm$ 158.21           | 46.97 $\pm$ 2.76 | 5.73 $\pm$ 0.22 | 29.99 $\pm$ 1.04                 |
|             | D3        | 10209.79 $\pm$ 2466.29         | 2.04 $\pm$ 0.49       | 2795.64 $\pm$ 187.91           | 50.68 $\pm$ 3.20 | 5.52 $\pm$ 0.05 | 29.21 $\pm$ 0.45                 |
|             | D4        | 11720.12 $\pm$ 444.33          | 2.41 $\pm$ 0.09       | 2685.23 $\pm$ 238.39           | 48.08 $\pm$ 4.23 | 5.58 $\pm$ 0.06 | 30.91 $\pm$ 0.74                 |
|             | D5        | 17945.43 $\pm$ 3243.38         | 3.92 $\pm$ 0.96       | 2897.60 $\pm$ 405.09           | 51.76 $\pm$ 6.88 | 5.60 $\pm$ 0.13 | 29.52 $\pm$ 0.65                 |
|             | D6        | 14949.89 $\pm$ 5206.13         | 3.39 $\pm$ 1.60       | 2774.82 $\pm$ 396.31           | 50.58 $\pm$ 6.60 | 5.48 $\pm$ 0.07 | 29.39 $\pm$ 0.44                 |
| Cultivar    | V1        | 12032.40 $\pm$ 2463.94         | 2.75 $\pm$ 0.56       | 2350.90 $\pm$ 318.59           | 46.34 $\pm$ 5.02 | 5.07 $\pm$ 0.21 | 37.48 $\pm$ 0.46                 |
|             | V2        | 10843.19 $\pm$ 1175.96         | 2.82 $\pm$ 0.31       | 2082.36 $\pm$ 385.25           | 44.14 $\pm$ 8.23 | 4.72 $\pm$ 0.01 | 35.72 $\pm$ 0.48                 |
|             | V3        | 12423.32 $\pm$ 1076.37         | 2.85 $\pm$ 0.25       | 2563.66 $\pm$ 205.22           | 46.64 $\pm$ 5.27 | 5.51 $\pm$ 0.18 | 29.73 $\pm$ 0.91                 |
|             | V4        | 11916.35 $\pm$ 3737.35         | 4.00 $\pm$ 1.25       | 1719.75 $\pm$ 195.61           | 33.84 $\pm$ 3.56 | 5.08 $\pm$ 0.15 | 30.68 $\pm$ 0.43                 |
|             | V5        | 9930.72 $\pm$ 421.55           | 2.68 $\pm$ 0.11       | 2846.31 $\pm$ 149.00           | 63.24 $\pm$ 2.40 | 4.50 $\pm$ 0.06 | 35.66 $\pm$ 0.24                 |
|             | V6        | 12449.50 $\pm$ 3440.02         | 2.76 $\pm$ 0.76       | 2133.30 $\pm$ 166.78           | 41.86 $\pm$ 1.52 | 5.09 $\pm$ 0.22 | 31.84 $\pm$ 0.77                 |
|             | V7        | 12486.59 $\pm$ 937.02          | 2.81 $\pm$ 0.21       | 3263.85 $\pm$ 279.80           | 57.05 $\pm$ 5.00 | 5.72 $\pm$ 0.03 | 36.33 $\pm$ 0.21                 |
|             | V8        | 14117.89 $\pm$ 4970.41         | 3.37 $\pm$ 1.19       | 2394.56 $\pm$ 124.92           | 55.44 $\pm$ 3.84 | 4.32 $\pm$ 0.16 | 37.36 $\pm$ 1.37                 |
|             | V9        | 13483.07 $\pm$ 5281.41         | 3.35 $\pm$ 1.31       | 2095.00 $\pm$ 258.56           | 39.85 $\pm$ 4.19 | 5.25 $\pm$ 0.12 | 29.39 $\pm$ 0.30                 |
|             | V10       | 12304.93 $\pm$ 4822.60         | 2.77 $\pm$ 1.08       | 2528.59 $\pm$ 379.28           | 42.38 $\pm$ 6.02 | 5.96 $\pm$ 0.08 | 37.69 $\pm$ 0.35                 |

Note: AGB, above-ground biomass; RUE, radiation use efficiency; SY, seed cotton yield; LP, lint percentage; BW, boll weight; BN, boll number per unit area. Data represent the average of three replicates for the 2024 growing season.

**Table S3.** Descriptive statistics (mean  $\pm$  SD) of above-ground biomass, radiation use efficiency, yield and yield components for all treatment combinations in 2025.

| Experiment  | Treatment | AGB<br>(kg $\cdot$ ha <sup>-1</sup> ) | RUE<br>(g MJ <sup>-1</sup> ) | SY<br>(kg $\cdot$ ha <sup>-1</sup> ) | LP<br>(%)         | BW<br>(g)       | BN<br>(bolls $\cdot$ m <sup>-2</sup> ) |
|-------------|-----------|---------------------------------------|------------------------------|--------------------------------------|-------------------|-----------------|----------------------------------------|
| Sowing date | S1        | 13420.07 $\pm$ 1323.02                | 4.38 $\pm$ 0.39              | 3565.02 $\pm$ 486.33                 | 66.37 $\pm$ 6.43  | 5.36 $\pm$ 0.35 | 34.78 $\pm$ 1.70                       |
|             | S2        | 12160.50 $\pm$ 1574.35                | 3.57 $\pm$ 1.00              | 3413.12 $\pm$ 298.09                 | 66.33 $\pm$ 3.48  | 5.14 $\pm$ 0.18 | 35.92 $\pm$ 0.90                       |
|             | S3        | 12869.39 $\pm$ 3079.65                | 4.06 $\pm$ 0.97              | 3312.53 $\pm$ 510.16                 | 61.24 $\pm$ 9.27  | 5.41 $\pm$ 0.05 | 35.30 $\pm$ 0.40                       |
|             | S4        | 13231.10 $\pm$ 1412.57                | 4.67 $\pm$ 0.50              | 3161.52 $\pm$ 240.93                 | 56.61 $\pm$ 3.57  | 5.59 $\pm$ 0.25 | 35.18 $\pm$ 0.83                       |
|             | S5        | 11027.50 $\pm$ 2120.38                | 3.59 $\pm$ 0.69              | 3099.49 $\pm$ 295.17                 | 54.96 $\pm$ 4.03  | 5.63 $\pm$ 0.13 | 35.07 $\pm$ 0.31                       |
|             | S6        | 10325.65 $\pm$ 3305.40                | 4.08 $\pm$ 1.31              | 3144.12 $\pm$ 202.47                 | 57.77 $\pm$ 2.87  | 5.44 $\pm$ 0.18 | 36.30 $\pm$ 0.56                       |
| Density     | D1        | 6721.05 $\pm$ 811.09                  | 2.31 $\pm$ 0.28              | 3174.80 $\pm$ 263.44                 | 55.05 $\pm$ 5.69  | 5.77 $\pm$ 0.11 | 32.45 $\pm$ 0.57                       |
|             | D2        | 7955.62 $\pm$ 422.01                  | 2.59 $\pm$ 0.14              | 3709.57 $\pm$ 361.39                 | 67.79 $\pm$ 7.11  | 5.48 $\pm$ 0.10 | 31.83 $\pm$ 0.34                       |
|             | D3        | 9567.51 $\pm$ 546.03                  | 2.94 $\pm$ 0.17              | 3791.26 $\pm$ 355.28                 | 71.27 $\pm$ 8.70  | 5.33 $\pm$ 0.18 | 32.24 $\pm$ 0.28                       |
|             | D4        | 11703.11 $\pm$ 3095.64                | 3.40 $\pm$ 0.90              | 3749.72 $\pm$ 122.27                 | 71.16 $\pm$ 3.72  | 5.27 $\pm$ 0.12 | 32.28 $\pm$ 0.85                       |
|             | D5        | 11416.49 $\pm$ 2924.95                | 3.11 $\pm$ 0.80              | 3674.06 $\pm$ 270.53                 | 68.62 $\pm$ 4.56  | 5.35 $\pm$ 0.04 | 32.19 $\pm$ 0.93                       |
|             | D6        | 12335.88 $\pm$ 5527.54                | 4.01 $\pm$ 1.80              | 3568.17 $\pm$ 160.81                 | 67.19 $\pm$ 4.52  | 5.32 $\pm$ 0.14 | 32.80 $\pm$ 0.23                       |
| Cultivar    | V1        | 15398.42 $\pm$ 1086.64                | 5.23 $\pm$ 0.80              | 3704.40 $\pm$ 572.89                 | 68.27 $\pm$ 8.42  | 5.41 $\pm$ 0.21 | 40.59 $\pm$ 0.45                       |
|             | V2        | 11037.07 $\pm$ 1307.64                | 3.64 $\pm$ 0.43              | 3668.12 $\pm$ 746.92                 | 71.49 $\pm$ 11.10 | 5.11 $\pm$ 0.26 | 38.84 $\pm$ 0.42                       |
|             | V3        | 11368.11 $\pm$ 3014.52                | 3.39 $\pm$ 0.90              | 3528.59 $\pm$ 709.89                 | 66.23 $\pm$ 11.59 | 5.31 $\pm$ 0.14 | 31.46 $\pm$ 1.01                       |
|             | V4        | 12743.13 $\pm$ 2044.79                | 3.57 $\pm$ 0.57              | 3234.40 $\pm$ 523.71                 | 64.63 $\pm$ 10.69 | 5.01 $\pm$ 0.07 | 32.80 $\pm$ 0.55                       |
|             | V5        | 10790.66 $\pm$ 1708.07                | 3.54 $\pm$ 0.56              | 3516.20 $\pm$ 483.79                 | 69.90 $\pm$ 7.40  | 5.02 $\pm$ 0.28 | 36.85 $\pm$ 0.87                       |
|             | V6        | 12767.80 $\pm$ 2534.62                | 3.60 $\pm$ 0.72              | 4137.65 $\pm$ 357.21                 | 75.53 $\pm$ 4.08  | 5.47 $\pm$ 0.19 | 32.94 $\pm$ 0.65                       |
|             | V7        | 11201.84 $\pm$ 2143.83                | 3.12 $\pm$ 0.60              | 3655.53 $\pm$ 484.40                 | 71.66 $\pm$ 8.34  | 5.09 $\pm$ 0.09 | 37.24 $\pm$ 0.47                       |
|             | V8        | 14824.09 $\pm$ 2030.25                | 6.39 $\pm$ 0.70              | 3232.45 $\pm$ 584.52                 | 64.25 $\pm$ 8.68  | 5.01 $\pm$ 0.34 | 37.18 $\pm$ 2.13                       |
|             | V9        | 11519.08 $\pm$ 2832.68                | 4.22 $\pm$ 1.04              | 3928.19 $\pm$ 148.05                 | 73.24 $\pm$ 2.63  | 5.36 $\pm$ 0.10 | 32.42 $\pm$ 1.03                       |
|             | V10       | 11932.17 $\pm$ 2198.20                | 3.51 $\pm$ 0.65              | 3887.02 $\pm$ 474.90                 | 67.18 $\pm$ 3.54  | 5.77 $\pm$ 0.40 | 39.73 $\pm$ 0.54                       |

Note: Abbreviations are as defined in Table S1. Data represent the average of three replicates for the 2025 growing season.

**Table S4.** Pooled descriptive statistics (mean  $\pm$  SD) of above-ground biomass, radiation use efficiency, and yield components across 2024 and 2025.

| Experiment  | Treatment | AGB<br>(kg • ha <sup>-1</sup> ) | RUE<br>(g MJ <sup>-1</sup> ) | SY<br>(kg • ha <sup>-1</sup> ) | LP<br>(%)         | BW<br>(g)       | BN<br>(bolls • m <sup>-2</sup> ) |
|-------------|-----------|---------------------------------|------------------------------|--------------------------------|-------------------|-----------------|----------------------------------|
| Sowing date | S1        | 13845.21 $\pm$ 1097.57          | 3.87 $\pm$ 0.62              | 3030.98 $\pm$ 663.76           | 59.57 $\pm$ 8.64  | 5.05 $\pm$ 0.42 | 34.68 $\pm$ 1.10                 |
|             | S2        | 12160.17 $\pm$ 1020.84          | 3.09 $\pm$ 0.82              | 3013.90 $\pm$ 509.39           | 60.69 $\pm$ 7.12  | 4.94 $\pm$ 0.26 | 35.88 $\pm$ 0.77                 |
|             | S3        | 12770.02 $\pm$ 2467.75          | 3.37 $\pm$ 1.03              | 2808.17 $\pm$ 652.21           | 54.75 $\pm$ 9.42  | 5.09 $\pm$ 0.36 | 34.86 $\pm$ 0.80                 |
|             | S4        | 13053.97 $\pm$ 1207.98          | 3.88 $\pm$ 0.95              | 2685.54 $\pm$ 556.62           | 51.06 $\pm$ 6.89  | 5.22 $\pm$ 0.44 | 34.62 $\pm$ 0.88                 |
|             | S5        | 11689.38 $\pm$ 1764.54          | 3.10 $\pm$ 0.71              | 2474.03 $\pm$ 744.29           | 46.41 $\pm$ 10.40 | 5.25 $\pm$ 0.44 | 34.51 $\pm$ 0.74                 |
|             | S6        | 9760.57 $\pm$ 2295.69           | 3.10 $\pm$ 1.36              | 2351.34 $\pm$ 925.05           | 44.60 $\pm$ 15.54 | 5.19 $\pm$ 0.32 | 34.65 $\pm$ 1.91                 |
| Density     | D1        | 6435.12 $\pm$ 883.99            | 2.02 $\pm$ 0.40              | 2706.34 $\pm$ 585.91           | 46.78 $\pm$ 10.33 | 5.79 $\pm$ 0.11 | 31.81 $\pm$ 1.25                 |
|             | D2        | 7691.86 $\pm$ 1873.52           | 2.16 $\pm$ 0.64              | 3200.28 $\pm$ 611.15           | 57.38 $\pm$ 12.38 | 5.60 $\pm$ 0.21 | 30.91 $\pm$ 1.22                 |
|             | D3        | 9888.65 $\pm$ 1635.86           | 2.49 $\pm$ 0.59              | 3293.45 $\pm$ 601.66           | 60.98 $\pm$ 12.71 | 5.42 $\pm$ 0.16 | 30.72 $\pm$ 1.69                 |
|             | D4        | 11711.61 $\pm$ 1977.94          | 2.91 $\pm$ 0.79              | 3217.47 $\pm$ 607.17           | 59.62 $\pm$ 13.14 | 5.43 $\pm$ 0.19 | 31.60 $\pm$ 1.04                 |
|             | D5        | 14680.96 $\pm$ 4518.63          | 3.52 $\pm$ 0.90              | 3285.83 $\pm$ 525.15           | 60.19 $\pm$ 10.61 | 5.47 $\pm$ 0.16 | 30.85 $\pm$ 1.63                 |
|             | D6        | 13642.89 $\pm$ 5011.28          | 3.70 $\pm$ 1.56              | 3171.50 $\pm$ 511.85           | 58.88 $\pm$ 10.41 | 5.40 $\pm$ 0.13 | 31.10 $\pm$ 1.89                 |
| Cultivar    | V1        | 13715.41 $\pm$ 2509.93          | 3.99 $\pm$ 1.49              | 3027.65 $\pm$ 849.39           | 57.30 $\pm$ 13.52 | 5.24 $\pm$ 0.27 | 39.03 $\pm$ 1.75                 |
|             | V2        | 10940.13 $\pm$ 1117.32          | 3.23 $\pm$ 0.56              | 2875.24 $\pm$ 1018.29          | 57.81 $\pm$ 17.34 | 4.91 $\pm$ 0.27 | 37.28 $\pm$ 1.76                 |
|             | V3        | 11895.72 $\pm$ 2105.33          | 3.12 $\pm$ 0.66              | 3046.12 $\pm$ 705.51           | 56.44 $\pm$ 13.41 | 5.41 $\pm$ 0.18 | 30.60 $\pm$ 1.28                 |
|             | V4        | 12329.74 $\pm$ 2732.15          | 3.79 $\pm$ 0.90              | 2477.08 $\pm$ 901.81           | 49.24 $\pm$ 18.31 | 5.04 $\pm$ 0.11 | 31.74 $\pm$ 1.24                 |
|             | V5        | 10360.69 $\pm$ 1208.28          | 3.11 $\pm$ 0.59              | 3181.25 $\pm$ 486.96           | 66.57 $\pm$ 6.12  | 4.76 $\pm$ 0.34 | 36.25 $\pm$ 0.86                 |
|             | V6        | 12608.65 $\pm$ 2708.06          | 3.18 $\pm$ 0.81              | 3135.47 $\pm$ 1125.79          | 58.69 $\pm$ 18.65 | 5.28 $\pm$ 0.28 | 32.39 $\pm$ 0.88                 |
|             | V7        | 11844.21 $\pm$ 1638.53          | 2.96 $\pm$ 0.43              | 3459.69 $\pm$ 413.76           | 64.35 $\pm$ 10.09 | 5.41 $\pm$ 0.35 | 36.79 $\pm$ 0.59                 |
|             | V8        | 14470.99 $\pm$ 3417.66          | 4.88 $\pm$ 1.87              | 2813.50 $\pm$ 594.58           | 59.84 $\pm$ 7.70  | 4.67 $\pm$ 0.45 | 37.27 $\pm$ 1.61                 |
|             | V9        | 12501.08 $\pm$ 3940.07          | 3.79 $\pm$ 1.16              | 3011.59 $\pm$ 1021.61          | 56.54 $\pm$ 18.55 | 5.31 $\pm$ 0.12 | 30.91 $\pm$ 1.79                 |
|             | V10       | 12118.55 $\pm$ 3358.20          | 3.14 $\pm$ 0.90              | 3207.81 $\pm$ 837.47           | 54.78 $\pm$ 14.28 | 5.87 $\pm$ 0.28 | 38.71 $\pm$ 1.19                 |

Note: Abbreviations are as defined in Table S1. Data represent the pooled means and standard deviations across the two growing seasons.

**Table S5.** Coefficients of determination ( $R^2$ ) of the regression models between cotton canopy structural traits and iPAR under different treatments (2024 – 2025).

| Experiment  | Treatment | TLN<br>(per plant) | PH<br>(cm) | LAI<br>— |
|-------------|-----------|--------------------|------------|----------|
| Sowing date | S1        | 0.63**             | 0.84**     | 0.63**   |
|             | S2        | 0.68**             | 0.89**     | 0.55**   |
|             | S3        | 0.61**             | 0.84**     | 0.57**   |
|             | S4        | 0.68**             | 0.84       | 0.64**   |
|             | S5        | 0.49**             | 0.77**     | 0.53**   |
|             | S6        | 0.64**             | 0.77**     | 0.58**   |
| Density     | D1        | 0.38**             | 0.53**     | 0.30**   |
|             | D2        | 0.59**             | 0.72**     | 0.61**   |
|             | D3        | 0.73**             | 0.83**     | 0.66**   |
|             | D4        | 0.75**             | 0.88**     | 0.67**   |
|             | D5        | 0.76**             | 0.83**     | 0.68**   |
|             | D6        | 0.48**             | 0.69**     | 0.38**   |
| Cultivar    | V1        | 0.76**             | 0.82**     | 0.66**   |
|             | V2        | 0.63**             | 0.80**     | 0.58**   |
|             | V3        | 0.53**             | 0.70**     | 0.51**   |
|             | V4        | 0.84**             | 0.83**     | 0.76**   |
|             | V5        | 0.73**             | 0.86**     | 0.79**   |
|             | V6        | 0.88**             | 0.80**     | 0.89**   |
|             | V7        | 0.71**             | 0.76**     | 0.74**   |
|             | V8        | 0.76**             | 0.78**     | 0.73**   |
|             | V9        | 0.85**             | 0.70**     | 0.69**   |
|             | V10       | 0.85**             | 0.87**     | 0.85**   |

Note: Data represent the  $R^2$  values for each individual treatment. All regression models are statistically significant at  $P < 0.01$ .

**Table S6.** Variance inflation factor (VIF) diagnostics and random forest model performance metrics at the comprehensive dataset ( $n=132$ ) and cultivar subset ( $n=60$ ) scales.

| Analysis Type     | Variable          | Comprehensive dataset | Cultivar subset |
|-------------------|-------------------|-----------------------|-----------------|
| VIF Diagnostics   | $V_{\text{cmax}}$ | —                     | 38.55           |
|                   | $J_{\text{max}}$  | —                     | 26.81           |
|                   | $P_n$             | —                     | 2.35            |
|                   | $G_s$             | —                     | 12.52           |
|                   | $T_r$             | —                     | 16.73           |
|                   | PH                | 12.3                  | 40.85           |
|                   | TLN               | 5.12                  | 15.61           |
|                   | iPAR              | 6.14                  | 8.38            |
|                   | LAI               | 2.11                  | 4.44            |
|                   | SLN               | 8.98                  | 17.94           |
|                   | SPAD              | 1.11                  | 1.92            |
|                   | LMA               | 3.23                  | 3.09            |
|                   | C/N               | 6.98                  | 11.90           |
| Model Performance | Train $R^2$       | 0.88                  | 0.86            |
|                   | Train RMSE        | 1.24                  | 0.55            |
|                   | CV $R^2$          | -0.01                 | -2.41           |
|                   | CV RMSE           | 1.24                  | 1.44            |

Note: "—" indicates that the leaf gas exchange and photosynthetic parameters were not evaluated in the comprehensive dataset. Abbreviations are listed in the Abbreviations section. CV stands for cross-validation.

**Table S7.** Measurement model reliability and validity assessment for the PLS-SEM.

| Model Scale                                | Latent Construct | Indicators                                       | Outer Loadings               | Cronbach's $\alpha$ | Composite Reliability CR) | AVE   |
|--------------------------------------------|------------------|--------------------------------------------------|------------------------------|---------------------|---------------------------|-------|
| Comprehensive Dataset<br>( <i>n</i> = 132) | Canopy           | PH, TLN, LAI, iPAR                               | 0.975, 0.869, 0.655, 0.884   | 0.87                | 0.914                     | 0.729 |
|                                            | Leaf             | SPAD, SLN, LMA, C/N                              | -0.414, 0.835, 0.074, -0.902 | N/A                 | N/A                       | N/A   |
|                                            | Composition      | LP, BW, BN                                       | 0.522, 0.175, 0.949          | N/A                 | N/A                       | N/A   |
| Cultivar Subset ( <i>n</i> = 60)           | Canopy           | PH, TLN, LAI, iPAR                               | 0.977, 0.960, 0.861, 0.949   | 0.954               | 0.867                     | 0.88  |
|                                            | Leaf             | SPAD, SLN, LMA, C/N                              | -0.414, 0.958, 0.294, -0.939 | N/A                 | N/A                       | N/A   |
|                                            | Gas              | P <sub>n</sub> , T <sub>r</sub> , G <sub>s</sub> | 0.538, 0.962, 0.967          | 0.805               | 0.888                     | 0.717 |
|                                            | Physiology       | V <sub>cmax</sub> , J <sub>max</sub>             | 0.978, 0.978                 | 0.954               | 0.978                     | 0.956 |
|                                            | Composition      | LP, BW, BN                                       | 0.632, 0.228, 0.918          | N/A                 | N/A                       | N/A   |

Note: N/A = Not applicable. .Single-indicator constructs are not listed as their metrics are fixed at 1.0. For the 'Leaf Functional Traits' and 'Yield Components' constructs, conventional internal consistency metrics (Cronbach's  $\alpha$ , CR, AVE) are mathematically inapplicable. These operate as formative indices containing inherent biological trade-offs, such as the negative correlation between specific leaf nitrogen and C/N ratio, as well as the classic compensatory relationship between boll number and boll weight.

**Table S8. Structural model path coefficients, bootstrapped confidence intervals, and collinearity diagnostics for the comprehensive dataset ( $n = 132$ ).**

| <b>Path Relationships</b> | <b>Path Coefficient (<math>\beta</math>)</b> | <b>p-value</b> | <b>95% CI Lower</b> | <b>95% CI High</b> | <b>Inner VIF</b> |
|---------------------------|----------------------------------------------|----------------|---------------------|--------------------|------------------|
| Treatment → Canopy        | 0.050                                        | 0.529          | -0.079              | 0.248              | 1.010            |
| Treatment → Leaf          | -0.448                                       | 0.295          | -0.586              | 0.539              | 1.015            |
| Treatment → Composition   | 0.276                                        | 0.002          | 0.023               | 0.378              | 1.395            |
| Climate → Canopy          | -0.729                                       | 0.006          | -0.914              | -0.570             | 1.010            |
| Climate → Leaf            | 0.111                                        | 0.688          | -0.547              | 0.486              | 2.171            |
| Climate → Composition     | 0.524                                        | 0.028          | 0.288               | 0.926              | 2.268            |
| Canopy → Leaf             | -0.353                                       | 0.264          | -0.530              | 0.470              | 2.182            |
| Canopy → Efficiency       | -0.225                                       | 0.192          | -0.484              | 0.211              | 2.406            |
| Canopy → Biomass          | 0.537                                        | 0.000          | 0.397               | 0.666              | 2.464            |
| Leaf → Efficiency         | -0.094                                       | 0.499          | -0.331              | 0.218              | 1.799            |
| Leaf → Biomass            | 0.112                                        | 0.274          | -0.158              | 0.180              | 1.809            |
| Efficiency → Biomass      | 0.972                                        | 0.000          | 0.880               | 1.062              | 1.150            |
| Efficiency → Composition  | -0.119                                       | 0.541          | -0.495              | 0.290              | 8.251            |
| Biomass → Composition     | 0.172                                        | 0.367          | -0.225              | 0.530              | 7.523            |
| Biomass → Yield           | -0.118                                       | 0.321          | -0.355              | 0.109              | 7.605            |
| Composition → Yield       | 0.918                                        | 0.000          | 0.718               | 1.003              | 2.791            |

Note: CI = confidence interval; VIF = variance inflation factor. Path coefficients ( $\beta$ ) and 95% confidence intervals were estimated based on 2,000 bootstrap resamples.



**Table S9. Structural model path coefficients, bootstrapped confidence intervals, and collinearity diagnostics for the cultivar subset ( $n = 60$ ).**

| <b>Path Relationship</b> | <b>Path Coefficient (<math>\beta</math>)</b> | <b>p-value</b> | <b>95% CI Lower</b> | <b>95% CI High</b> | <b>Inner VIF</b> |
|--------------------------|----------------------------------------------|----------------|---------------------|--------------------|------------------|
| Treatment → Canopy       | 0.170                                        | 0.000          | 0.080               | 0.253              | 1.000            |
| Treatment → Leaf         | 0.009                                        | 0.892          | -0.143              | 0.130              | 1.271            |
| Climate → Canopy         | -0.930                                       | 0.000          | -0.982              | -0.883             | 1.000            |
| Climate → Leaf           | 0.948                                        | 0.176          | -1.131              | 1.240              | 9.102            |
| Canopy → Leaf            | 0.041                                        | 0.834          | -0.360              | 0.401              | 9.374            |
| Canopy → Gas             | 0.141                                        | 0.503          | -0.328              | 0.478              | 3.368            |
| Canopy → Physiology      | -0.513                                       | 0.000          | -0.655              | -0.374             | 3.404            |
| Canopy → Biomass         | 0.347                                        | 0.039          | 0.103               | 0.761              | 7.022            |
| Leaf → Gas               | 0.786                                        | 0.184          | -0.936              | 1.039              | 3.368            |
| Leaf → Physiology        | 0.317                                        | 0.178          | -0.393              | 0.458              | 4.495            |
| Gas → Physiology         | 0.240                                        | 0.000          | 0.166               | 0.329              | 1.825            |
| Gas → Efficiency         | -0.077                                       | 0.656          | -0.471              | 0.198              | 2.584            |
| Physiology → Efficiency  | 0.157                                        | 0.793          | -0.942              | 1.287              | 13.131           |
| Physiology → Composition | 0.566                                        | 0.027          | 0.029               | 1.048              | 13.349           |
| Efficiency → Biomass     | 0.998                                        | 0.000          | 0.810               | 1.083              | 1.197            |
| Efficiency → Composition | -0.322                                       | 0.117          | -0.723              | 0.092              | 7.225            |
| Biomass → Composition    | 0.201                                        | 0.325          | -0.202              | 0.604              | 6.052            |
| Biomass → Yield          | -0.056                                       | 0.678          | -0.346              | 0.210              | 4.270            |
| Composition → Yield      | 0.901                                        | 0.000          | 0.808               | 0.977              | 1.214            |

Note: CI = confidence interval; VIF = variance inflation factor. Path coefficients ( $\beta$ ) and 95% confidence intervals were estimated based on 2,000 bootstrap resamples.

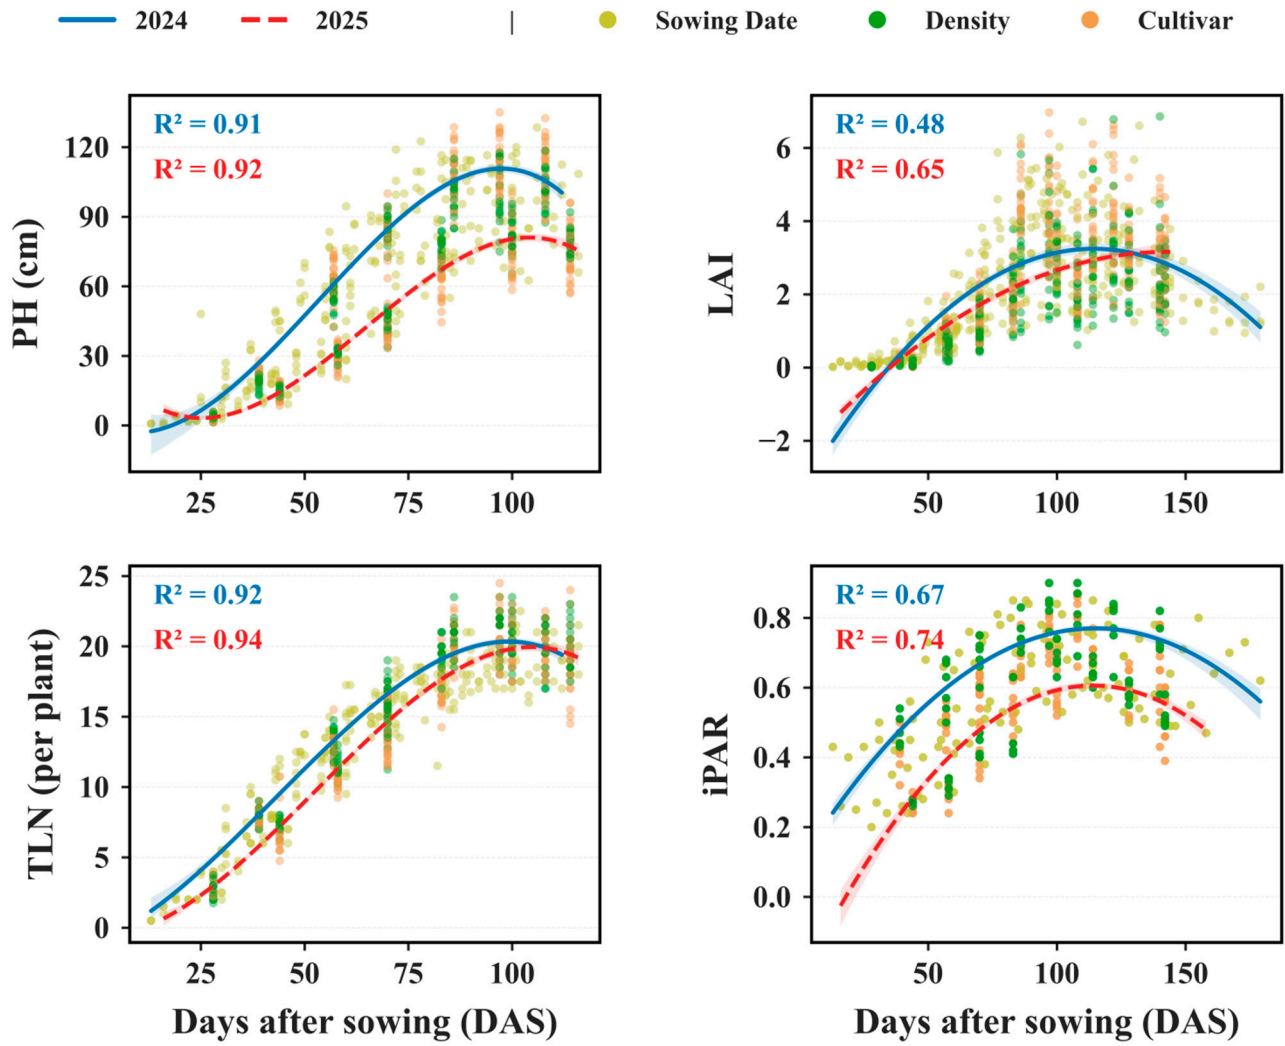

**Figure S1.** Temporal dynamics of cotton canopy structural traits, including plant height (PH), true leaf number (TLN), and leaf area index (LAI), and light interception rate (iPAR) throughout the growing season. Scatter points represent individual measurements at different days after sowing (DAS). The curves indicate temporal trends fitted with Logistic (for PH and TLN) or quadratic polynomial (for LAI and iPAR) models for the 2024 (solid lines) and 2025 (dashed lines) growing seasons.  $R^2$  values indicate the goodness of fit for the respective years.

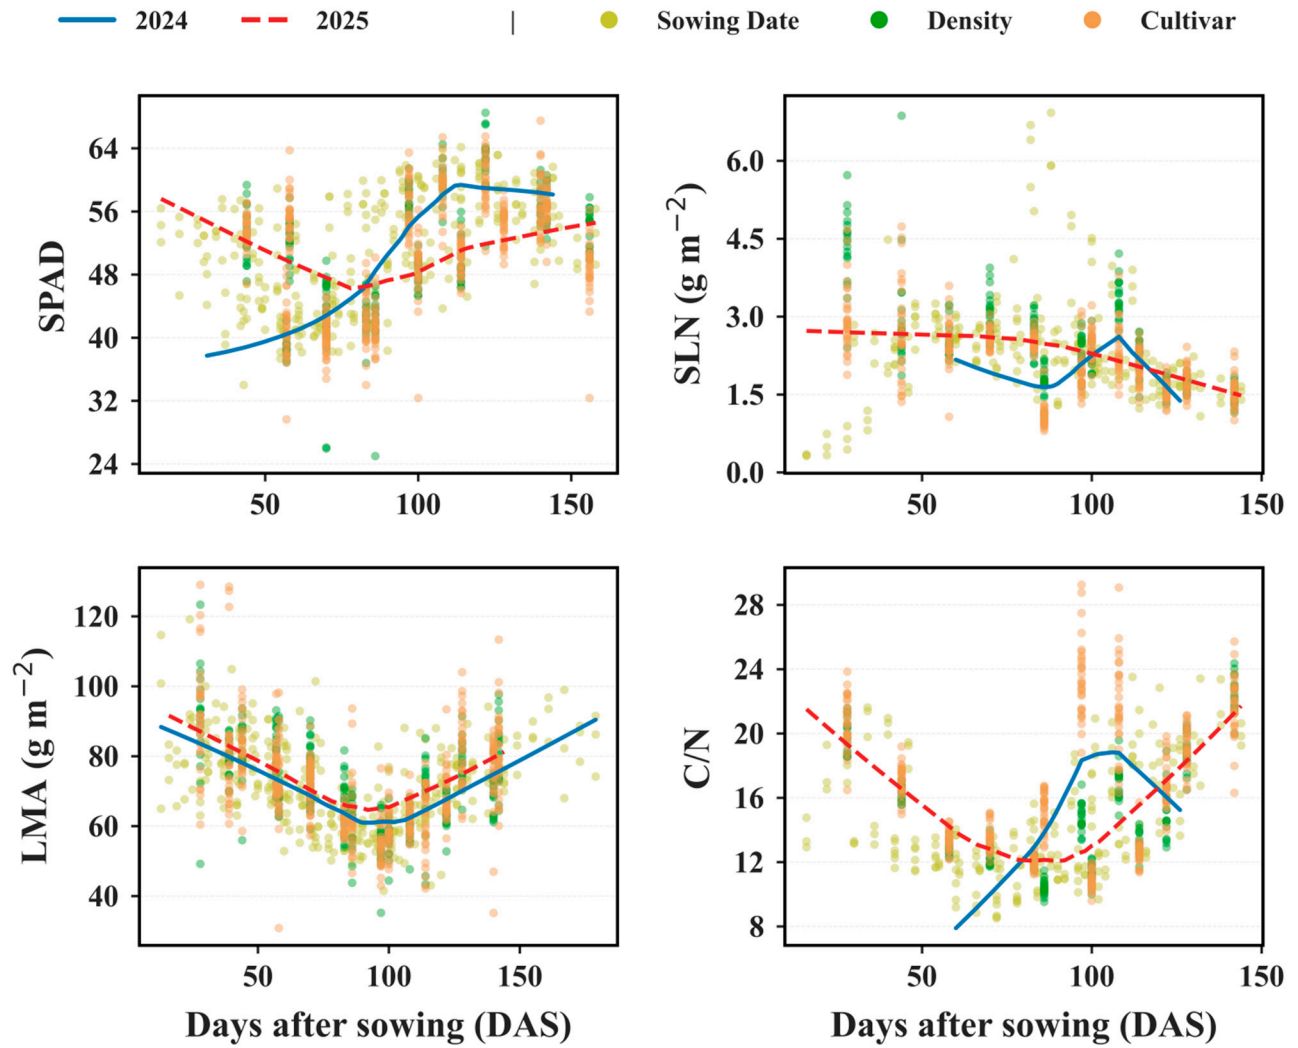

**Figure S2.** Temporal dynamics of cotton leaf functional traits, including leaf mass per area (LMA), carbon-to-nitrogen ratio (C/N), specific leaf nitrogen (SLN), and relative chlorophyll content (SPAD), throughout the growing season. Scatter points represent individual measurements at different days after sowing (DAS). The curves indicate temporal trends fitted using locally estimated scatterplot smoothing (LOESS) for the 2024 (solid lines) and 2025 (dashed lines) growing seasons.

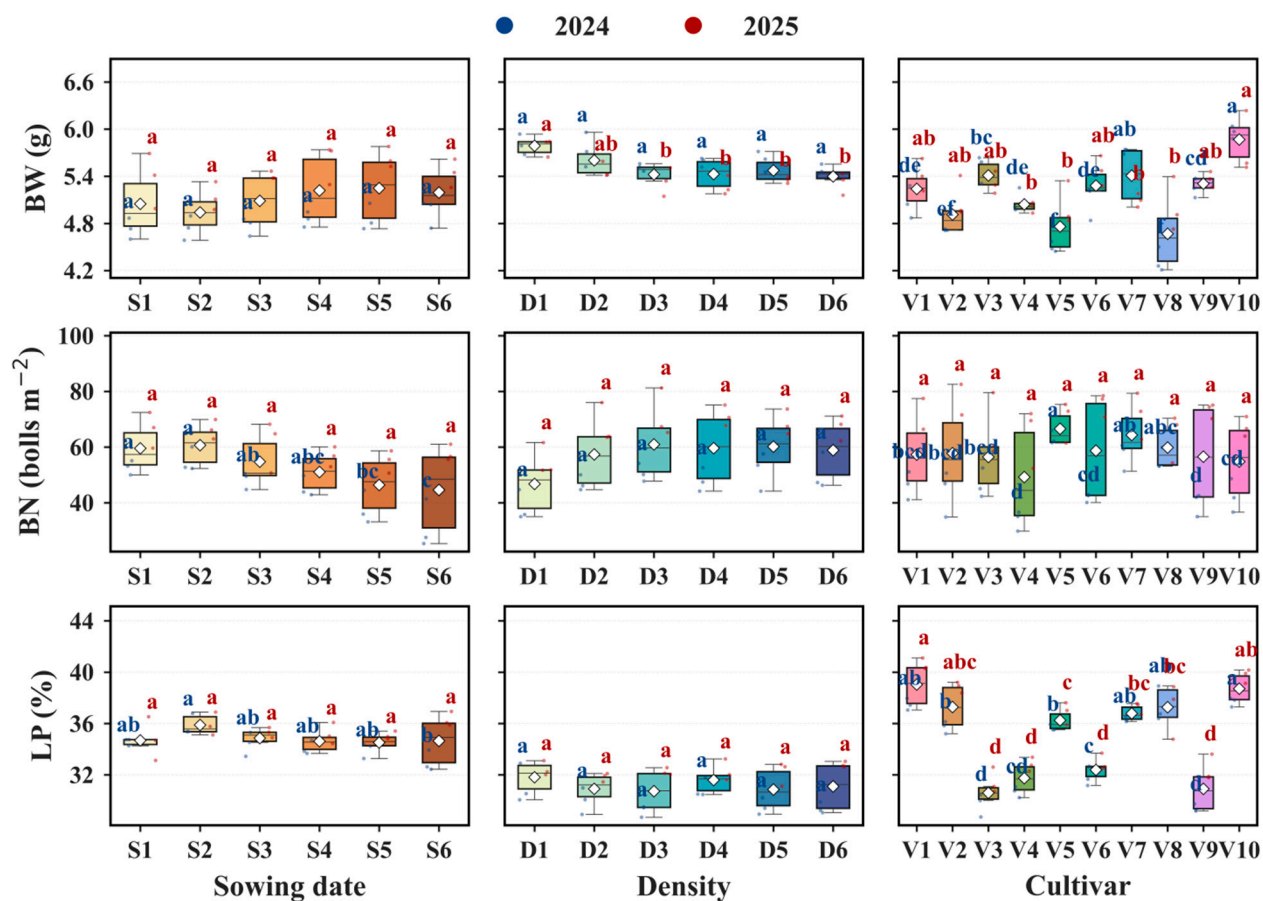

**Figure S3.** Impacts of agronomic management and genetic variation on cotton yield components including boll number per unit area (BN), boll weight (BW), and lint percentage (LP). Different lowercase letters above the boxplots indicate significant differences at  $P < 0.05$  based on Tukey's HSD test.
